# Supplementary material for: Structuring a conceptual model for cost-effectiveness analysis of frailty interventions
Source: PLOS journal article supplement (doi:10.1371/journal.pone.0222049), 2019-09-11
Supplement: S2 (10.1371/journal.pone.0222049.s002) [file journal.pone.0222049.s002]

**Thank you for participating in our survey. We greatly appreciate you taking the time to complete it.**

**This survey aims to identify important structural aspects of a frailty model.**

**The survey includes 2 sections and is expected to only take 10 minutes of your time. In the first section we focus on health outcomes. We present a number of "clinical states/events" for which frailty could be an independent risk factor (i.e. after controlling for other differences between frail and non-frail persons). We ask you to specify the extent to which frailty increases the risk of each state/event (magnitude of association). In the second section we need your inputs to specify a number of important "patient attributes" that influence the progression of frailty and the health outcomes identified in Section 1. We also ask you to identify additional important clinical states/events and patient attributes that have been missing from our list.**

**Please note that there are some conditions (e.g. depression) that have been presented in both sections. Our literature review has found a complex directional relationship between frailty and these conditions. While in some published studies frailty has been considered as an independent risk factor for these conditions, other studies have considered the conditions as an attribute that influences the progression of frailty and health outcomes.**

What is your name?

What is your speciality?



[illegible]

## SECTION 1: Other health outcomes

1.2 In your opinion, has any '**important**' health state/event been missing from our list?

Note: In this question, "important" is defined as a health state/event for which frailty is at least an **INTERMEDIATE** risk factor.

☐ Yes

☐ No

## SECTION 1: Other health outcomes

1.2.1 Please specify the important health states/events which have been missing from our list

1.

2.

3.

4.

5.

6.

7.

8.

9.

10.



[illegible]



## SECTION 2: Other patient attributes

2.2 In your opinion, has any '**important**' patient attribute been missing from our list?

Note: In this question, "important" is defined as a patient attribute that influences at least **INTERMEDIATELY** the progression of frailty and health outcomes

☐ Yes

☐ No

**SECTION 2: Other patient attributes**

2.2.1 Please specify the important patient attributes which have been missing from our list

|     |  |
|-----|--|
| 1.  |  |
| 2.  |  |
| 3.  |  |
| 4.  |  |
| 5.  |  |
| 6.  |  |
| 7.  |  |
| 8.  |  |
| 9.  |  |
| 10. |  |

**Additional comments**

Please include any further comments about health outcomes and patient attributes

**Thank you for completing this survey**
