# Supplementary material for: Structuring a conceptual model for cost-effectiveness analysis of frailty interventions
Source: PLOS journal article supplement (doi:10.1371/journal.pone.0222049), 2019-09-11
Supplement: S3 (10.1371/journal.pone.0222049.s003) [file journal.pone.0222049.s003]

**Table 1: Health states/event**

| Findings of the literature review                          | Rounds 1 and 2 results:<br>Level of agreement (conceptual model<br>inclusion/exclusion) | Round 3 results | Final list of health states/events<br>included in the conceptual model |
|------------------------------------------------------------|-----------------------------------------------------------------------------------------|-----------------|------------------------------------------------------------------------|
| Hip fracture                                               | Acceptable level of agreement ( <b>Include</b> )                                        | -               | ✓                                                                      |
| Vertebral fracture                                         | Unacceptable level of agreement (Exclude)                                               | -               | X                                                                      |
| Other fractures (excluding hip and<br>vertebral fractures) | Moderate level of agreement ( <b>Round 3</b> )                                          | Exclude         | X                                                                      |
| Falls                                                      | Acceptable level of agreement ( <b>Include</b> )                                        | -               | ✓                                                                      |
| Delirium                                                   | Moderate level of agreement ( <b>Round 3</b> )                                          | <b>Include</b>  | ✓                                                                      |
| Incontinence                                               | Moderate level of agreement ( <b>Round 3</b> )                                          | Exclude         | X                                                                      |
| Pressure ulcers                                            | Unacceptable level of agreement (Exclude)                                               | -               | X                                                                      |
| Sleep disorders                                            | Unacceptable level of agreement (Exclude)                                               | -               | X                                                                      |
| Residential care admission                                 | Acceptable level of agreement ( <b>Include</b> )                                        | -               | ✓                                                                      |
| Hospital admission                                         | Acceptable level of agreement ( <b>Include</b> )                                        | -               | ✓                                                                      |
| Polypharmacy                                               | Moderate level of agreement ( <b>Round 3</b> )                                          | Exclude         | X                                                                      |
| Heart failure                                              | Unacceptable level of agreement (Exclude)                                               | -               | X                                                                      |
| Angina                                                     | Unacceptable level of agreement (Exclude)                                               | -               | X                                                                      |
| Myocardial infarction                                      | Unacceptable level of agreement (Exclude)                                               | -               | X                                                                      |
| Stroke                                                     | Unacceptable level of agreement (Exclude)                                               | -               | X                                                                      |
| Diabetes                                                   | Unacceptable level of agreement (Exclude)                                               | -               | X                                                                      |
| Obesity                                                    | Unacceptable level of agreement (Exclude)                                               | -               | X                                                                      |
| Parkinson's disease                                        | Unacceptable level of agreement (Exclude)                                               | -               | X                                                                      |
| Impaired vision                                            | Unacceptable level of agreement (Exclude)                                               | -               | X                                                                      |
| Impaired hearing                                           | Unacceptable level of agreement (Exclude)                                               | -               | X                                                                      |
| Chronic Obstructive Pulmonary<br>Disease (COPD)            | Unacceptable level of agreement (Exclude)                                               | -               | X                                                                      |
| Poor oral health                                           | Unacceptable level of agreement (Exclude)                                               | -               | X                                                                      |
| Peripheral artery disease                                  | Unacceptable level of agreement (Exclude)                                               | -               | X                                                                      |
| Renal failure                                              | Unacceptable level of agreement (Exclude)                                               | -               | X                                                                      |
| Depression                                                 | Unacceptable level of agreement (Exclude)                                               | -               | X                                                                      |
| Cognitive impairment                                       | Moderate level of agreement ( <b>Round 3</b> )                                          | Exclude         | X                                                                      |
| Physical disability                                        | Acceptable level of agreement ( <b>Include</b> )                                        | -               | ✓                                                                      |
| Death                                                      | Acceptable level of agreement ( <b>Include</b> )                                        | -               | ✓                                                                      |
